# Supplementary material for: Ecotoxicological Effects of Four Commonly Used Organic Solvents on the Scleractinian Coral Montipora digitata
Source: MDPI journal article supplement (doi:10.3390/toxics11040367), 2023-04-12
Supplement: s1 [file s1]

# Supplementary material for

## Ecotoxicological effects of four commonly used organic solvents on the scleractinian coral *Montipora digitata*

Valentina Di Mauro<sup>1\*</sup>, Elham Kamyab<sup>2</sup>, Matthias Y. Kellermann<sup>1</sup>, Mareen Moeller<sup>1</sup>, Samuel Nietzer<sup>1</sup>, Laura H. Lüt-jens<sup>3</sup>, Sascha Pawlowski<sup>3</sup>, Mechtild Petersen-Thiery<sup>4</sup>, Peter J. Schupp<sup>1,5\*</sup>

<sup>1</sup> Environmental Biochemistry, Institute for Chemistry and Biology of the Marine Environment (ICBM), School of Mathematics and Science, Carl von Ossietzky University of Oldenburg, Schleusenstr. 1, 26382 Wilhelmshaven, Germany

<sup>2</sup> German Center for Marine Biodiversity Research (DZMB), Senckenberg am Meer, 26382 Wilhelmshaven, Germany

<sup>3</sup> Department of Product Safety, Regulatory Ecotoxicology, BASF SE, Carl-Bosch-Str. 38, 67056 Ludwigshafen am Rhein, Germany

<sup>4</sup> Product Stewardship & EHS Data Management, BASF Personal Care and Nutrition GmbH, Rheinpromenade 1, 40789 Monheim am Rhein, Germany

<sup>5</sup> Helmholtz Institute for Functional Marine Biodiversity (HIFMB) at the University of Oldenburg (HIFMB), Ammerländer Heerstr. 231, 26129 Oldenburg, Germany

\* Correspondence: Valentina Di Mauro, [valentina.di.mauro@uni-oldenburg.de](mailto:valentina.di.mauro@uni-oldenburg.de); Peter J. Schupp, [peter.schupp@uni-oldenburg.de](mailto:peter.schupp@uni-oldenburg.de)

\* Corresponding authors:

Valentina Di Mauro, [valentina.di.mauro@uni-oldenburg.de](mailto:valentina.di.mauro@uni-oldenburg.de)

Peter J. Schupp, [peter.schupp@uni-oldenburg.de](mailto:peter.schupp@uni-oldenburg.de)

## S1 – Material and Method

### S.1.1. Husbandry conditions (water parameters) in the aquarium facility of the Institute for Chemistry and Biology of the Marine Environment (ICBM, Wilhelmshaven, Germany)

Table S1. Main husbandry parameters in the aquarium facility of the ICBM.

| Physical-chemical parameter | Unit                | In facility      |
|-----------------------------|---------------------|------------------|
|                             |                     | <i>aquarium</i>  |
| Temperature                 | °C                  | 26 ± 0.5         |
| Salinity                    | PSU                 | 34 - 35          |
| Alkalinity                  | meg L <sup>-1</sup> | 2.5 - 2.7        |
| O <sub>2</sub>              |                     | > 75% saturation |
| pH                          |                     | 8.00 - 8.35      |
| Calcium                     | mg L <sup>-1</sup>  | 400 - 440        |
| Magnesium                   | mg L <sup>-1</sup>  | 1300 - 1380      |
| Nitrate                     | mg L <sup>-1</sup>  | 2 - 5            |
| Phosphate                   | mg L <sup>-1</sup>  | 0.06 - 0.15      |

### S.1.2. Threshold of water parameters in coral husbandry

Table S2: The main physico-chemical parameters and their ranges for the maintenance of corals in closed aquarium systems compared to natural conditions in coral reefs, modified from Borneman [1] (SSI = sea surface irradiation). <sup>a</sup> Minimum values as recommended by Fosså and Nilsen [2]. <sup>b</sup> Recommended range by TropicMarin [3]

| Physical-chemical parameter | Unit               | Range in reefs  | Acceptable range     | Ideal range             | Importance |
|-----------------------------|--------------------|-----------------|----------------------|-------------------------|------------|
|                             |                    | <i>nature</i>   | <i>aquarium</i>      | <i>aquarium</i>         |            |
| Light                       | μE m <sup>2</sup>  | 40 - 10% SSI    | 30 - 10% SSI         | > 10% SSI               | critical   |
| Temperature                 | °C                 | 21 - 30         | 24 - 28              | 26 - 28                 | critical   |
| Salinity                    | PSU                | 23 - 40         | 33 - 38              | 24 - 36                 | critical   |
| Alkalinity                  | mg L <sup>-1</sup> | 2.0 - 2.5       | 2.0 - 4.5            | 3.5 - 4.0               | critical   |
| O <sub>2</sub>              |                    | highly variable | slightly variable    | > 75% saturation        | critical   |
| pH                          |                    | 7.4 - 8.4       | 7.8 - 8.8            | 8.2 - 8.6               | important  |
| Calcium                     | mg L <sup>-1</sup> | 400-430         | 350-500              | 425 - 450               | important  |
| Nitrate                     | mg L <sup>-1</sup> | 0.00 - 0.20     | < 10.00              | 0.00 - 1.00             | important  |
| Phosphate                   | mg L <sup>-1</sup> | 0.00 - 0.02     | > 0.015 <sup>a</sup> | 0.03 - 0.1 <sup>b</sup> | essential  |

### S.1.3. Monitoring (HOBO Logger data) of incubator conditions during 16 days of experiment

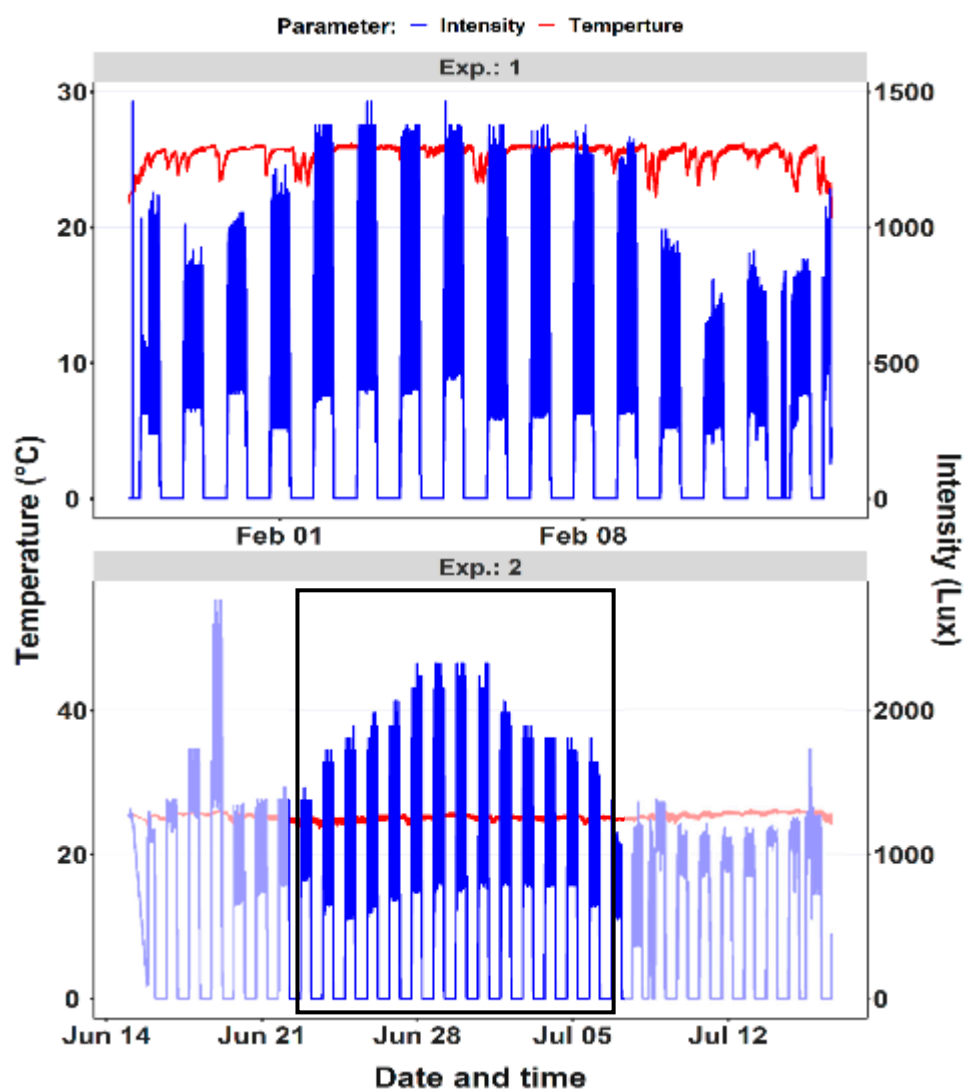

Figure S1: Data of hobo pendant logger in incubator, for sub-experiment 1 (top) and 2 (bottom, black rectangle). Here, temperatures (red) and light intensities (blue) are displayed as line graphs, during 16 days of exposure. Hobo-logger position in the back of the incubator due to space limitation.

### S.1.4. Measured water parameters during 16 days of exposure:

Table S3: Measured average water parameters within the 96-h water renewal interval.

| Treatment                                                     | Dose in $\mu\text{L L}^{-1}$ | Sampling point in h | 100% water renewal intervals | Nr. of replicates | N | Sal in PSU   |      | O <sub>2</sub> in mg L <sup>-1</sup> |       | pH          |      | Ca in mg L <sup>-1</sup> |      | ALK in meg L <sup>-1</sup> |      | PO <sub>4</sub> mg L <sup>-1</sup> |       | NO <sub>3</sub> mg L <sup>-1</sup> |       |
|---------------------------------------------------------------|------------------------------|---------------------|------------------------------|-------------------|---|--------------|------|--------------------------------------|-------|-------------|------|--------------------------|------|----------------------------|------|------------------------------------|-------|------------------------------------|-------|
|                                                               |                              |                     |                              |                   |   | Value        | SE   | Value                                | SE    | Value       | SE   | Value                    | SE   | Value                      | SE   | Value                              | SE    | Value                              | SE    |
| Initial: 0.2 $\mu\text{m}$ filtered artificial seawater media | 0                            | 0                   | flow through system          | -                 | 8 | 33.90        | 0.07 | 7.250                                | 0.165 | 8.10        | 0.02 | 454.0                    | 7.5  | 2.82                       | 0.04 | 0.133                              | 0.014 | 1.441                              | 0.313 |
| Negative Control                                              | 0                            | 96                  | 4                            | 6                 | 8 | 35.53        | 0.28 | 6.754                                | 0.043 | 7.89        | 0.29 | 449.5                    | 6.2  | 2.50                       | 0.08 | 0.037                              | 0.017 | 0.191                              | 0.104 |
| Ethanol                                                       | 50                           | 96                  | 4                            | 3                 | 4 | 35.56        | 0.27 | 6.668                                | 0.051 | 8.06        | 0.03 | 450.1                    | 12.5 | 2.32                       | 0.10 | 0.044                              | 0.005 | 0.068 *                            | 0.031 |
| Methanol                                                      | 50                           | 96                  | 4                            | 3                 | 4 | 36.43        | 0.30 | 6.591                                | 0.185 | 8.06        | 0.06 | 464.2                    | 6.4  | 2.50                       | 0.12 | 0.066                              | 0.040 | 0.273                              | 0.245 |
| Methanol                                                      | 100                          | 96                  | 4                            | 3                 | 4 | 36.98        | 0.26 | 6.493                                | 0.242 | 8.06        | 0.05 | 455.2                    | 14.8 | 2.45                       | 0.12 | 0.072                              | 0.037 | 0.200                              | 0.160 |
| Dimethyl sulfoxide                                            | 10                           | 96                  | 4                            | 3                 | 4 | 36.96        | 0.13 | 6.675                                | 0.184 | 8.07        | 0.03 | 460.4                    | 12.5 | 2.36                       | 0.10 | 0.037                              | 0.007 | 0.474                              | 0.233 |
| Dimethyl sulfoxide                                            | 50                           | 96                  | 4                            | 3                 | 4 | 36.83        | 0.65 | 6.713                                | 0.067 | 8.09        | 0.04 | 469.3                    | 8.5  | 2.45                       | 0.22 | 0.039                              | 0.011 | 0.339                              | 0.233 |
| Dimethyl formamide                                            | 50                           | 96                  | 4                            | 3                 | 4 | 35.93        | 0.21 | 6.643                                | 0.035 | 8.24        | 0.02 | 441.2                    | 10.7 | 2.62                       | 0.03 | 0.003 *                            | 0.001 | 0.197                              | 0.098 |
| Dimethyl formamide                                            | 100                          | 96                  | 4                            | 3                 | 4 | 35.31        | 0.19 | 6.615                                | 0.047 | 8.24        | 0.02 | 436.1                    | 7.9  | 2.67                       | 0.10 | 0.015                              | 0.012 | 0.278                              | 0.156 |
| <b><i>θ</i> total (t0; t96)</b>                               | -                            | -                   | -                            | -                 | 9 | 35.94        | 0.33 | 6.711                                | 0.072 | 8.09        | 0.03 | 453.3                    | 3.5  | 2.52                       | 0.05 | 0.050                              | 0.013 | 0.385                              | 0.137 |
| <b>% recovery of initial value after 96 h:</b>                |                              |                     |                              |                   |   | <b>106.8</b> |      | <b>91.6</b>                          |       | <b>99.8</b> |      | <b>99.8</b>              |      | <b>88.1</b>                |      | <b>29.4</b>                        |       | <b>17.5</b>                        |       |

(\*) values with strongest variation to related data-set

## S2 – Results

### S2.1 – Morphology

#### S2.1.1. Reference from day 1

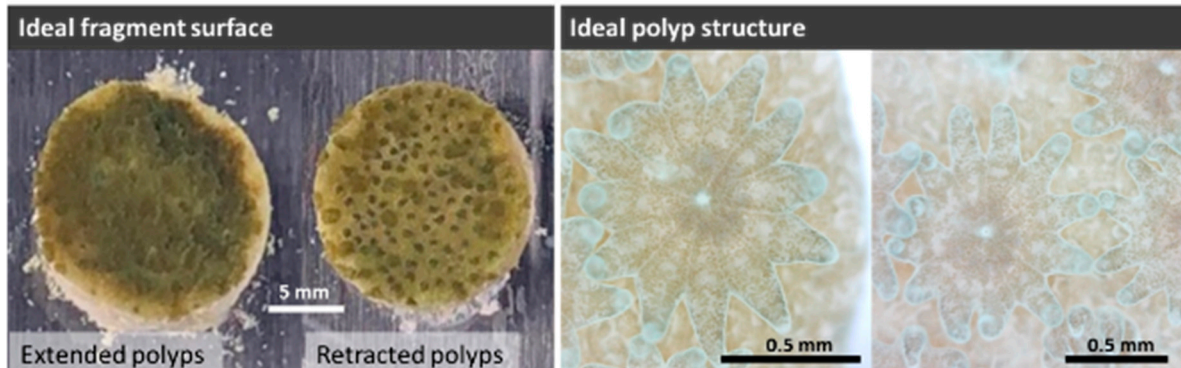

Figure S2: Reference structure of fragments (left) and polyps (right) from day 1.

Reference structure:

- Fragments (left): Polyps on fragment surface are homogenously distributed and dense; saturated colour, even when polyps are retracted
- Polyps (right): round shape, well pigmented, round fleshy tentacles

#### S.2.1.2. First sub-experiment (Exp.:1)

##### S.2.1.2.1. Negative control (NC I) at day 16

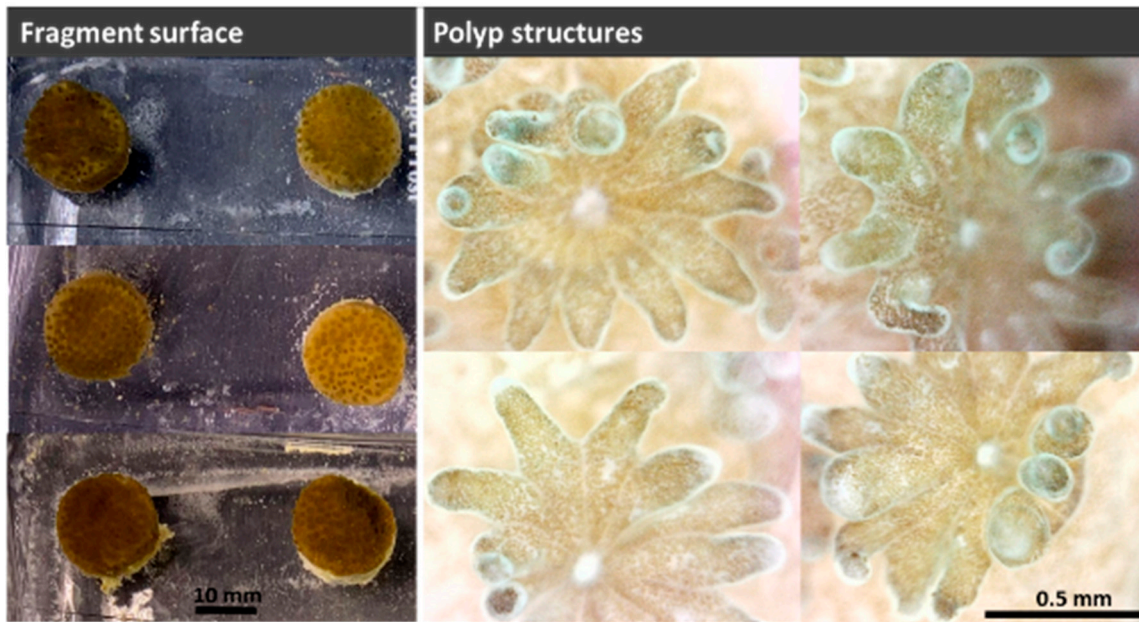

Figure S3: Structures of fragments (left) and polyps (right) for NC(I) after 16 days of exposure.

NC structure:

- Fragments (left): Polyps on fragment surface are homogenously distributed and dense; saturated colour, even when polyps are retracted; occasionally slightly brighter
- Polyps (right): round shape, well pigmented, uniform round fleshy tentacles



#### S2.1.2.2. 50 $\mu\text{L L}^{-1}$ ethanol (EtOH) at day 16

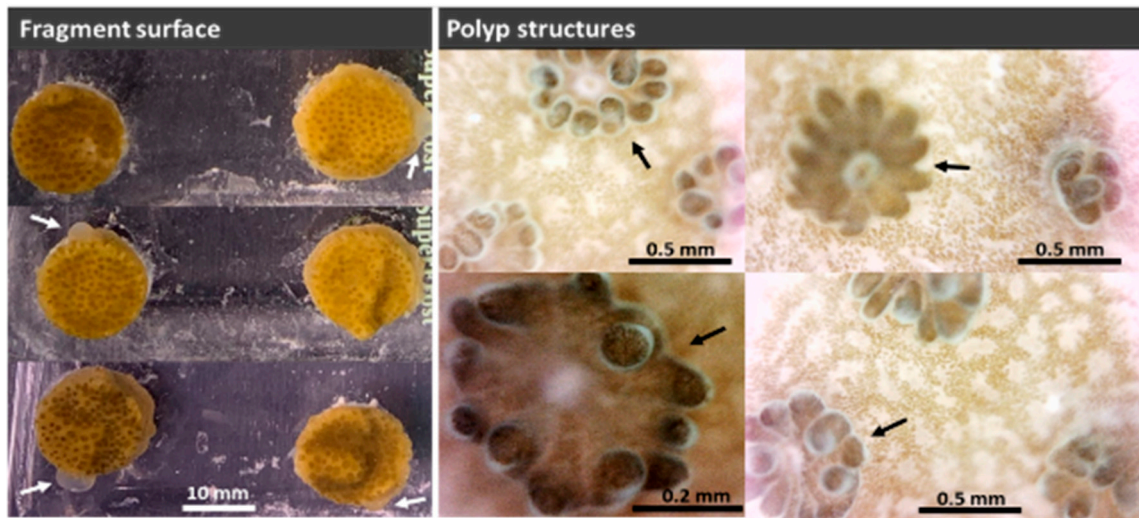

Figure S4: Structures of fragments (left) and polyps (right) for EtOH ( $50 \mu\text{L L}^{-1}$ ) after 16 days of exposure. Arrows indicating abnormalities.

EtOH structure:

- Fragments (left): Polyps on fragment are well distributed; occasionally losses of polyps; mostly slightly brighter; tissue alterations (swelling) indicated with white arrows
- Polyps (right): round but small shape, maintained pigmentation, retracted tentacles (black arrows)

#### S2.1.2.3. 50 $\mu\text{L L}^{-1}$ methanol (MeOH 50) at day 16

MeOH 50 structure:

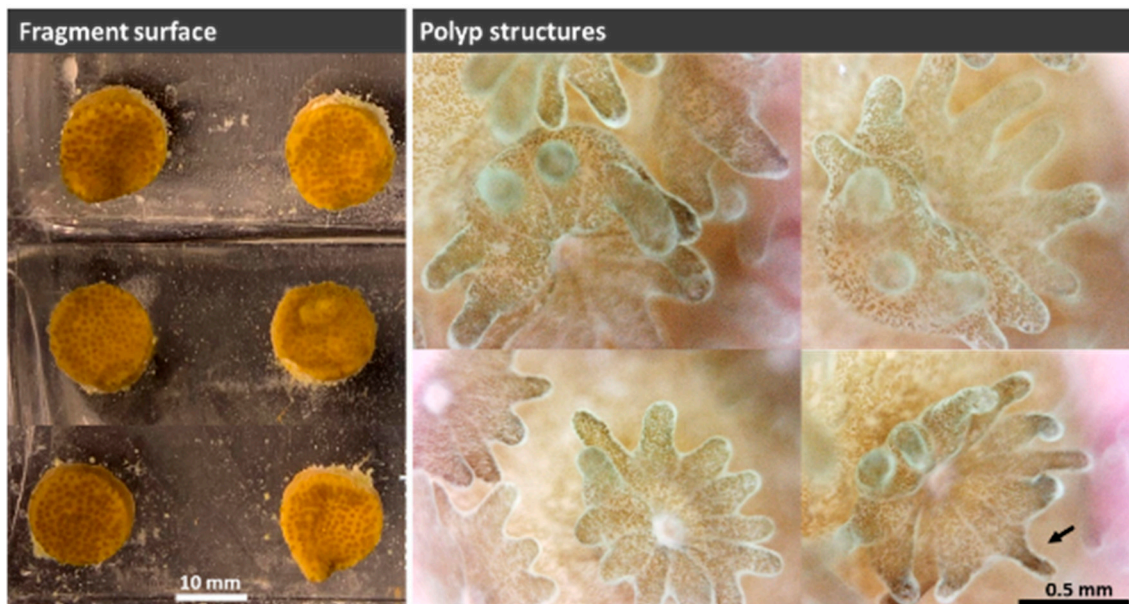

Figure S5: Structures of fragments (left) and polyps (right) for MeOH ( $50 \mu\text{L L}^{-1}$ ) after 16 days of exposure.

- Fragments (left): Polyps on fragment are well distributed; occasionally losses of polyps; brighter fragments
- Polyps (right): round shape, well pigmented; round, fleshy but occasionally more retracted tentacles; occasional abnormalities (black arrow)

#### S.2.1.2.4. 100 $\mu\text{L L}^{-1}$ methanol (MeOH 100) at day 16

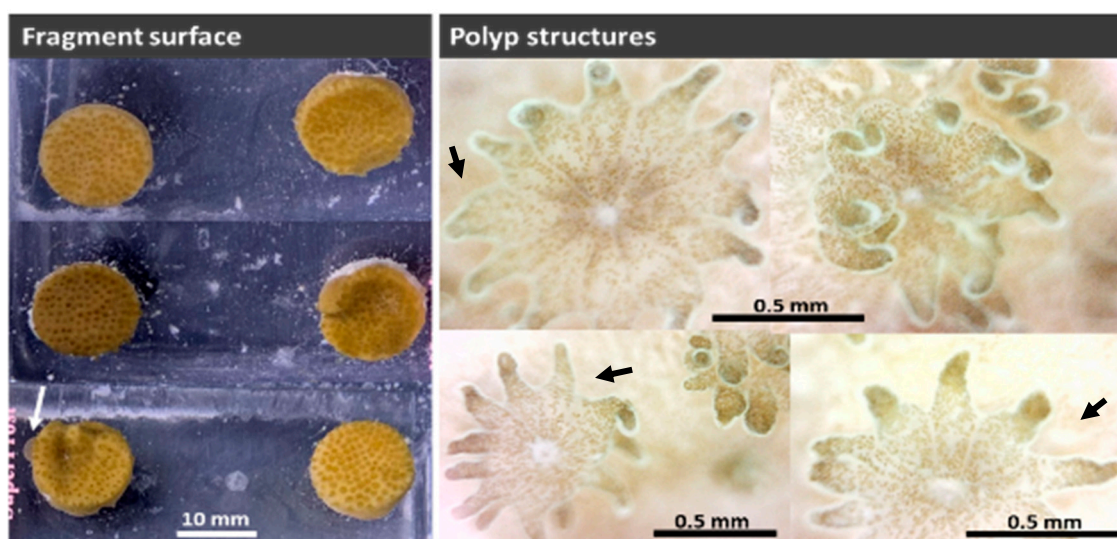

Figure S6: Structures of fragments (left) and polyps (right) for MeOH ( $100 \mu\text{L L}^{-1}$ ) after 16 days of exposure. Arrows indicating abnormalities.

MeOH 100 structure:

- Fragments (left): Polyps on fragment are well distributed; occasionally losses of polyps; mostly slightly brighter; tissue alterations (swelling) indicated with white arrows
- Polyps (right): round, but punctuated pigmentation; abnormal sharp, patchy and distorted tentacles (black arrows)

#### S2.1.2.5. 10 $\mu\text{L L}^{-1}$ dimethyl sulfoxide (DMSO 10) at day 16

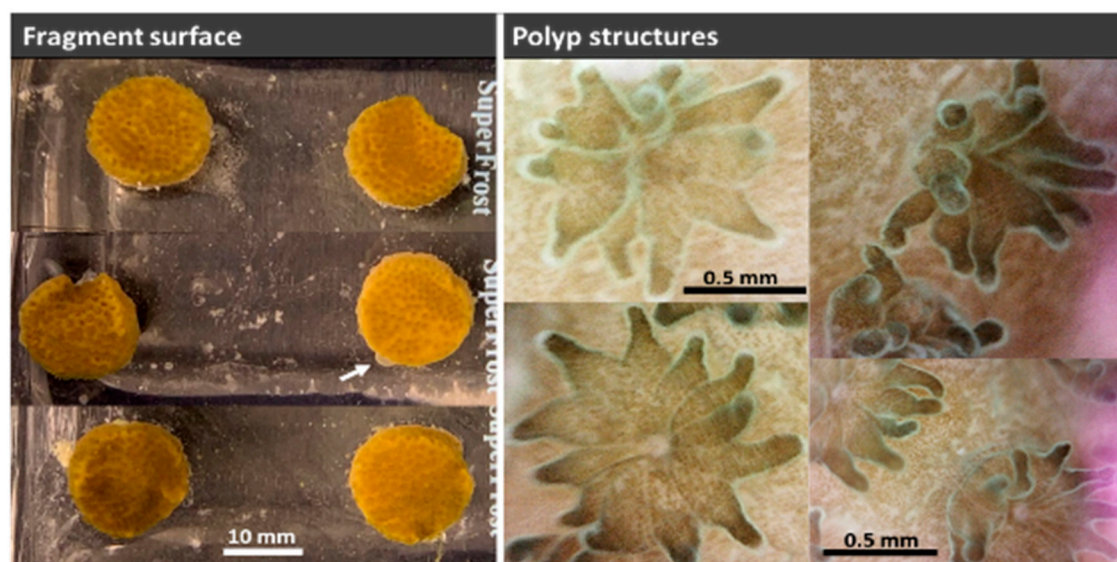

Figure S7: Structures of fragments (left) and polyps (right) for DMSO ( $10 \mu\text{L L}^{-1}$ ) after 16 days of exposure. Arrows indicating abnormalities.

DMSO 10 structure:

- Fragments (left): Polyps on fragment are well distributed; occasionally losses of polyps; mostly slightly brighter; occasionally tissue alterations (swelling) indicated with white arrows
- Polyps (right): round; stronger pigmentation especially in tips; abnormal patchy and distorted tentacles, with nodular tips (black arrows)



#### S2.1.2.6. 50 $\mu\text{L L}^{-1}$ dimethyl sulfoxide (DMSO 50) at day 16

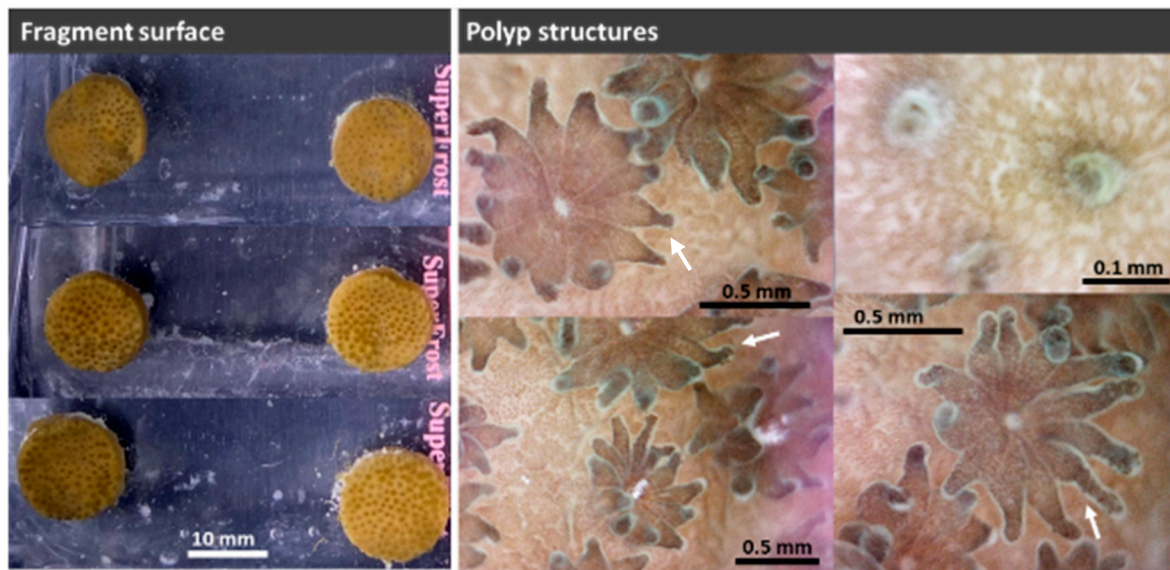

Figure S8: Structures of fragments (left) and polyps (right) for DMSO ( $50 \mu\text{L L}^{-1}$ ) after 16 days of exposure. Arrows indicating abnormalities.

DMSO 50 structure:

- Fragments (left): Polyps on fragment are well distributed; occasionally losses of polyps; mostly slightly brighter
- Polyps (right): round; stronger pigmentation especially in tips; strong abnormal, patchy and distorted tentacles, with nodular tips (white arrows)

#### S2.1.3. Second sub-experiment (Exp.: 2)

##### S2.1.3.1. Negative control (NC II) at day 16

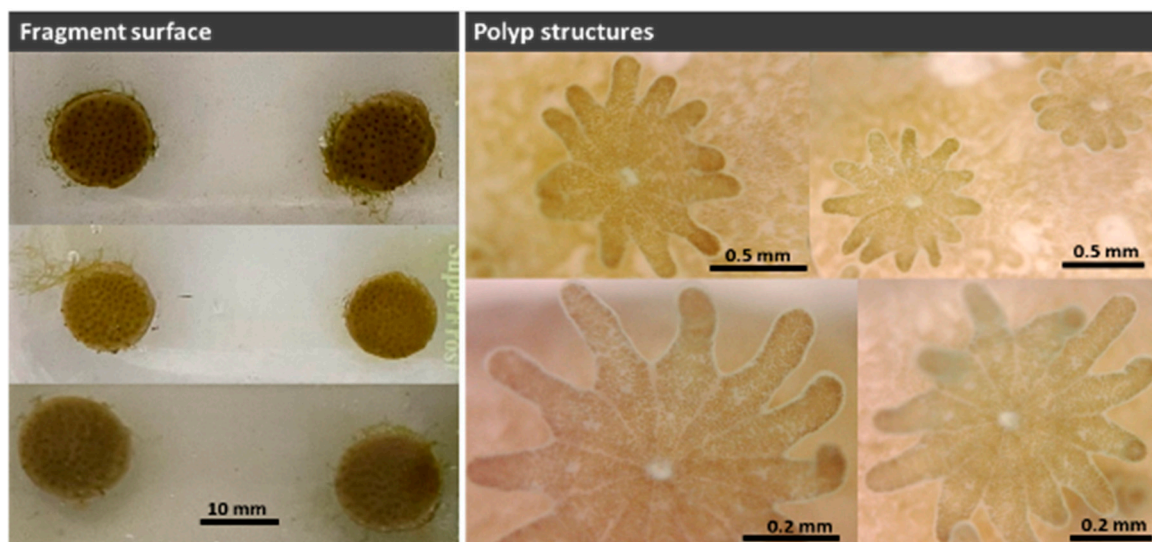

Figure S9: Structures of fragments (left) and polyps (right) for NC(II) after 16 days of exposure.

NC structure:

- Fragments (left): Polyps on fragment surface are homogenously distributed and dense; saturated colour, even when polyps are retracted; occasionally slightly brighter
- Polyps (right): round shape, well pigmented, uniform round fleshy tentacles



### S2.1.3.2. 50 $\mu\text{L L}^{-1}$ dimethyl formamide (DMF 50) at day 16

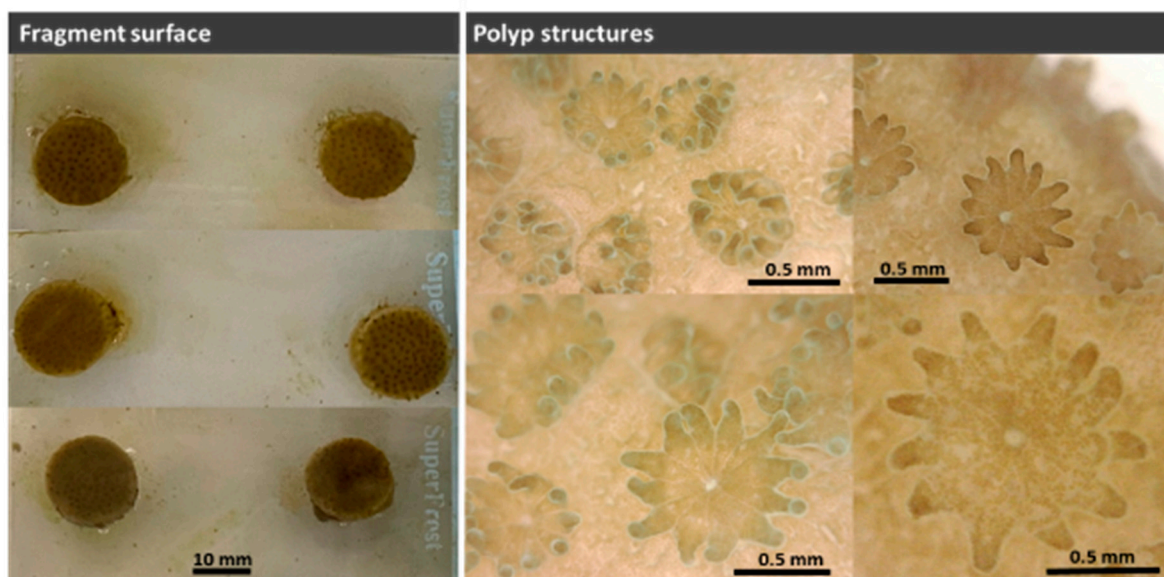

Figure S10: Structures of fragments (left) and polyps (right) for DMF ( $50 \mu\text{L L}^{-1}$ ) after 16 days of exposure.

DMF 50 structure:

- Fragments (left): Polyps on fragment surface are homogenously distributed and dense; saturated colour, even when polyps are retracted
- Polyps (right): round shape, well pigmented; uniform round, fleshy and extended tentacles

### S2.1.3.3. 100 $\mu\text{L L}^{-1}$ dimethyl formamide (DMF 100) at day 16

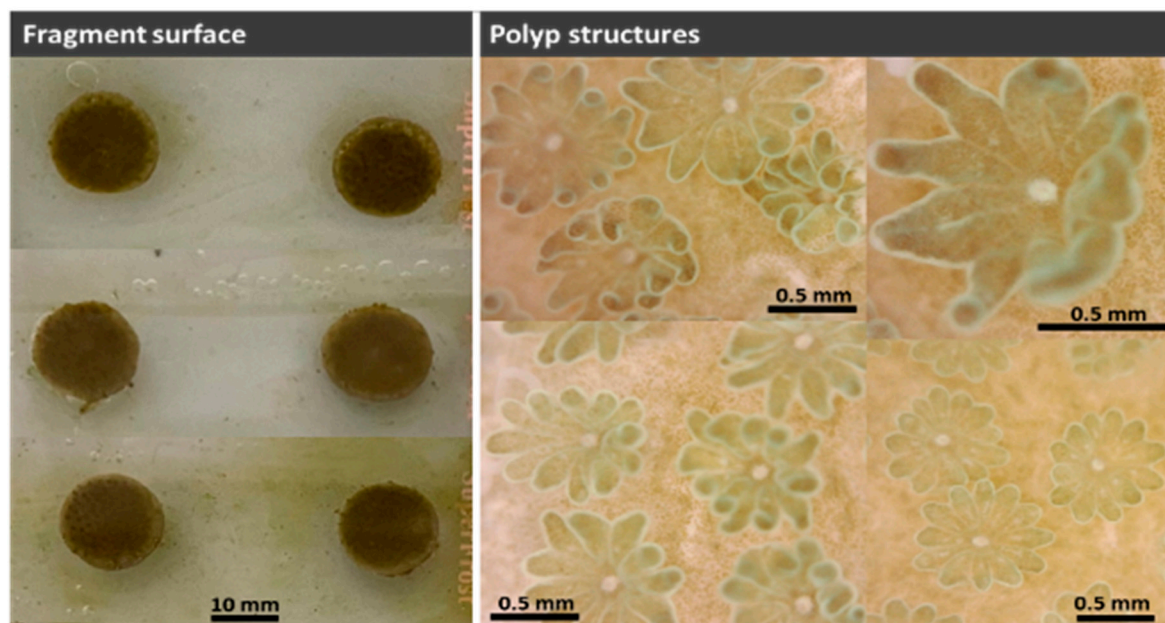

Figure S11: Structures of fragments (left) and polyps (right) for DMF( $100 \mu\text{L L}^{-1}$ ) after 16 days of exposure

DMF 100 structure:

- Fragments (left): Polyps on fragment surface are homogenously distributed and still dense; saturated colour, even when polyps are retracted
- Polyps (right): round shape, well pigmented; uniform round, fleshy and extended tentacles

## S.2.2. Biomarker cellular energy allocation as it is calculated form energy availability (i.e., carbohydrates (CBH), lipids, proteins) and energy consumption (i.e., energy transport system (ETS))

### S.2.2.1 – Sub-experiment 1

#### - Energy availability:

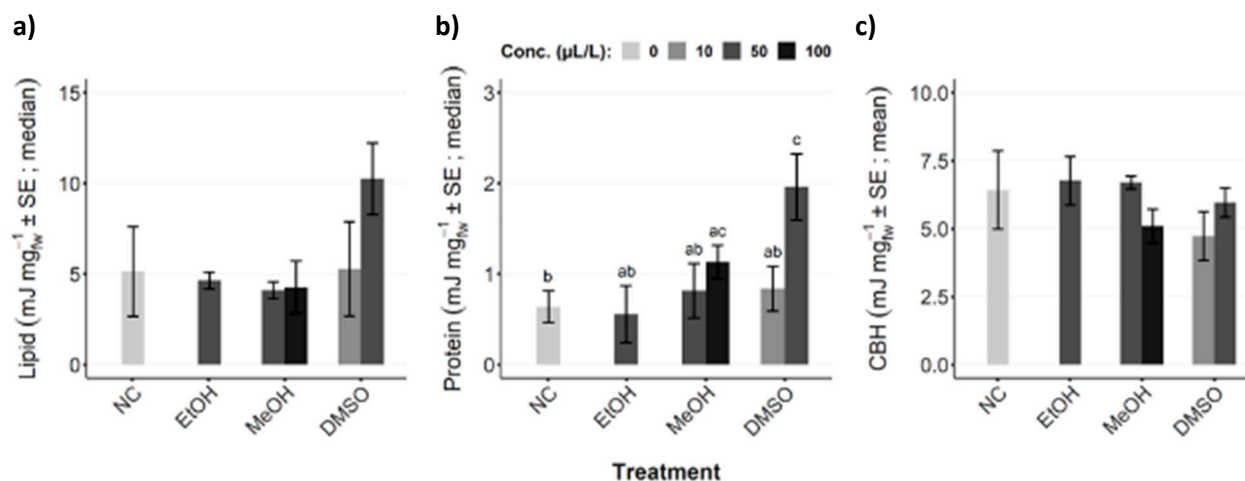

Figure S12: Analysis of energy reserves in respect of calculating CEA for *M. digitata* considering carbohydrates (CBH; (a)), lipids (b) and protein (c) for the control (NC) and each treatment of the first sub-experiment. Here, same letters indicating no significant differences. No presented letters indicate no significant differences between treatments (i.e., control, solvent) at all.

#### - Energy consumption:

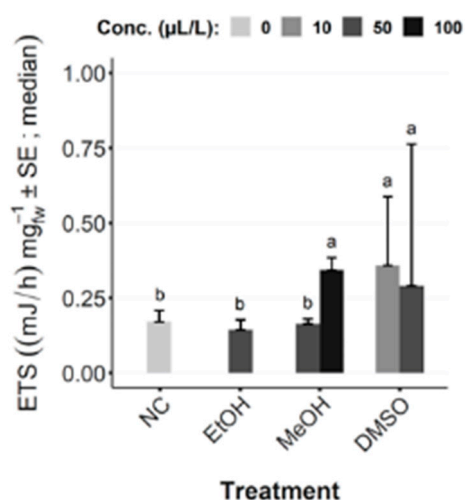

Figure S13: Analysis of energy consumption in respect of calculating CEA for *M. digitata* considering energy transport system (ETS) for the control (NC) and each treatment of the first sub-experiment. Here, same letters indicating no significant differences.

### S.2.2.1 – Sub-experiment 2

#### - Energy availability:

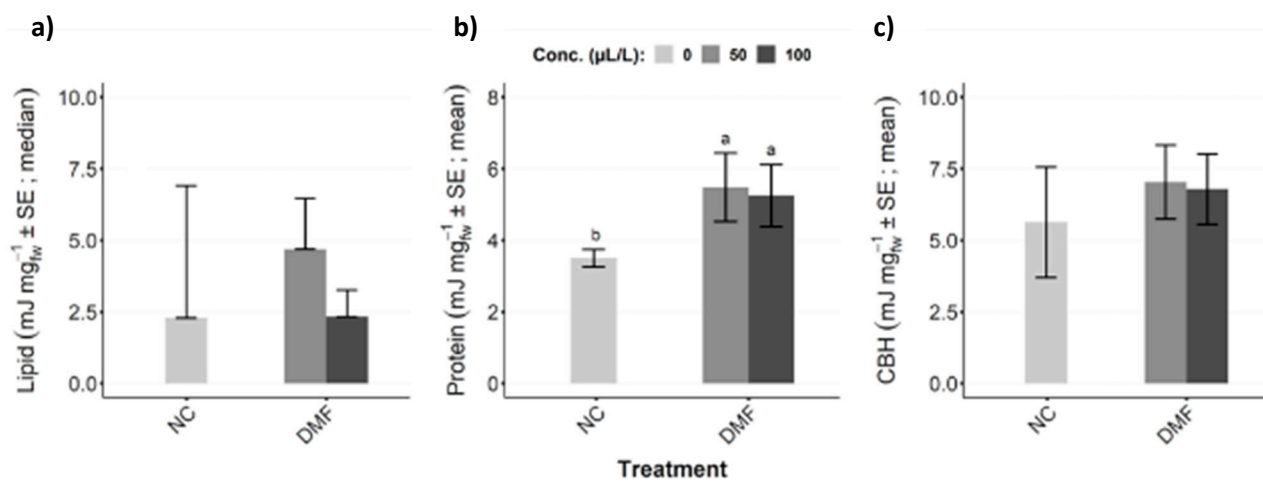

Figure S14: Analysis of energy reserves in respect of calculating CEA for *M. digitata* considering carbohydrates (CBH; (a)), lipids (b) and protein (c) for the control (NC) and each treatment of the second sub-experiment. Here, same letters indicating no significant differences. No presented letters indicate no significant differences between treatments (i.e., control, solvent) at all.

#### - Energy consumption:

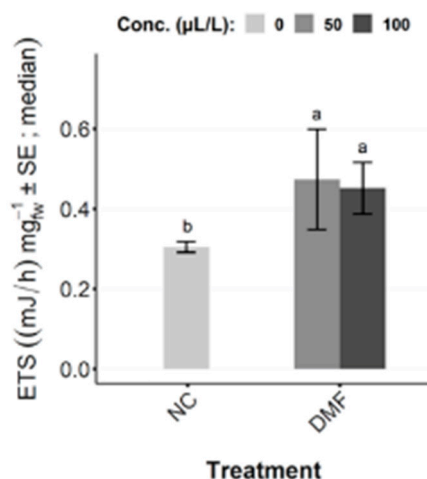

Figure S15: Analysis of energy consumption in respect of calculating CEA for *M. digitata* considering energy transport system (ETS) for the control (NC) and each treatment second sub-experiment. Here, same letters indicating no significant differences.



## S3 – Statistics

### S.3.1. Statistics for optical density and photosynthetic efficiency of the two sub-experiments

Table S4: Statistical analysis for each measured marker (i.e., optical density, photosynthetic efficiency) (grey background= comparisons with controls; bold= indicating statistical significances).

| Marker                          | Statistical Test                                            | Comparison |        |      |          |          |        | Statistic               | p-value |
|---------------------------------|-------------------------------------------------------------|------------|--------|------|----------|----------|--------|-------------------------|---------|
| Optical density (OD)            |                                                             |            |        |      |          |          |        |                         |         |
|                                 | Shapiro-Wilk normality test                                 |            |        |      |          |          |        | W=0.51141               | <0.0001 |
|                                 | Levene's Test for homogeneity of variance (centre = median) |            |        |      |          |          |        | F=1.4917                | 0,0089  |
|                                 |                                                             |            |        |      |          |          |        |                         |         |
|                                 | Kruskal-Wallis rank sum test                                |            |        |      |          |          |        | $\chi^2$ (63)=329.44    | <0.0001 |
|                                 | Dunn's post hoc comparison                                  |            | Group1 | t(d) | -        | Group2   | t(d)   |                         |         |
|                                 |                                                             | NC1        |        |      | -        | NC2      |        | -0,8318                 | 0,5615  |
|                                 |                                                             | NC1        |        |      | -        | EtOH     |        | -7,4152                 | <0.0001 |
|                                 |                                                             | NC1        |        |      | -        | MeOH 50  |        | 1,2448                  | 0,3688  |
|                                 |                                                             | NC1        |        |      | -        | MeOH 100 |        | -1,717                  | 0,1821  |
|                                 |                                                             | NC1        |        |      | -        | DMSO 10  |        | 0,527                   | 0,6602  |
|                                 |                                                             | NC1        |        |      | -        | DMSO 50  |        | -0,6601                 | 0,6321  |
|                                 |                                                             | NC2        |        |      | -        | DMF 50   |        | -1,5507                 | 0,242   |
|                                 |                                                             | NC2        |        |      | -        | DMF 100  |        | -2,068                  | 0,1071  |
|                                 |                                                             | EtOH 50    |        |      | -        | MeOH 50  |        | -8,66                   | <0.0001 |
|                                 |                                                             | EtOH 50    |        |      | -        | MeOH 100 |        | -5,6834                 | <0.0001 |
|                                 |                                                             | EtOH 50    |        |      | -        | DMSO 10  |        | 7,9423                  | <0.0001 |
|                                 |                                                             | EtOH 50    |        |      | -        | DMSO 50  |        | 6,7406                  | <0.0001 |
|                                 |                                                             | EtOH 50    |        |      | -        | DMF 50   |        | 6,8501                  | <0.0001 |
|                                 |                                                             | EtOH 50    |        |      | -        | DMF 100  |        | 6,3422                  | <0.0001 |
| Photosynthetic efficiency (PAM) |                                                             |            |        |      |          |          |        |                         |         |
|                                 | Shapiro-Wilk normality test                                 |            |        |      |          |          |        | 0,9935                  | 0,7974  |
|                                 | Bartlett test of homogeneity of variances                   |            |        |      |          |          |        | k <sup>2</sup> = 67.265 | 0,01353 |
|                                 | Welch ANOVA                                                 |            |        |      |          |          |        | 17,9                    | <0.0001 |
|                                 | Games Howell post hoc comparison                            | NC1        | 0      | -    | NC2      | 0        | 0,000  | 1,000                   |         |
|                                 |                                                             | NC1        | 16     | -    | NC2      | 16       | 0,190  | 1,000                   |         |
|                                 |                                                             | NC1        | 16     | -    | EtOH     | 16       | 1,920  | 1,000                   |         |
|                                 |                                                             | NC1        | 16     | -    | MeOH 50  | 16       | 5,001  | 0,828                   |         |
|                                 |                                                             | NC1        | 16     | -    | MeOH 100 | 16       | 4,072  | 0,936                   |         |
|                                 |                                                             | NC1        | 16     | -    | DMSO 10  | 16       | 2,364  | 1,000                   |         |
|                                 |                                                             | NC1        | 16     | -    | DMSO 50  | 16       | 1,899  | 0,999                   |         |
|                                 |                                                             | NC2        | 16     | -    | DMF 50   | 16       | -0,814 | 1,000                   |         |
|                                 |                                                             | NC2        | 16     | -    | DMF 100  | 16       | -0,207 | 1,000                   |         |
|                                 |                                                             | NC1        | 0      | -    | NC1      | 16       | -7,067 | 0,454                   |         |
|                                 |                                                             | NC2        | 0      | -    | NC2      | 16       | -6,877 | 0,118                   |         |
|                                 |                                                             | EtOH       | 0      | -    | EtOH     | 16       | -5,558 | 0,542                   |         |
|                                 |                                                             | MeOH 50    | 0      | -    | MeOH 50  | 16       | -7,571 | 0,208                   |         |
|                                 |                                                             | MeOH 100   | 0      | -    | MeOH 100 | 16       | -8,485 | 0,141                   |         |
|                                 |                                                             | DMSO 10    | 0      | -    | DMSO 10  | 16       | -5,840 | 0,394                   |         |
|                                 |                                                             | DMSO 50    | 0      | -    | DMSO 50  | 16       | -7,384 | 0,033                   |         |
|                                 |                                                             | DMF 50     | 0      | -    | DMF 50   | 16       | -8,897 | 0,167                   |         |
|                                 |                                                             | DMF 100    | 0      | -    | DMF 100  | 16       | -6,807 | 0,718                   |         |

### S.3.2 Statistics for biomarker analyses (i.e., CEA, LPO, CAT) of the two sub-experiments.

Table S5: Statistical analysis for each measured biomarker (i.e., cellular energy allocation, lipid peroxidation, catalyse) of each sub-experiment. (grey background= comparisons with controls; bold= indicating statistical significances)

| Biomarker                        | Statistical Test                                            | Comparison |   | Statistic      | p-value |       |
|----------------------------------|-------------------------------------------------------------|------------|---|----------------|---------|-------|
| SUB-EXPERIMENT 1                 |                                                             |            |   |                |         |       |
| Cellular energy allocation (CEA) |                                                             |            |   |                |         |       |
|                                  | Shapiro-Wilk normality test                                 |            |   | W=0.96145      | 0.08    |       |
|                                  | Bartlett test of homogeneity of variances                   |            |   | k²=35.124      | <0.0001 |       |
|                                  | Welch ANOVA                                                 |            |   | F=18.165       | <0.0001 |       |
|                                  | Games Howell post hoc comparison                            | Group1     | - | Group2         |         |       |
|                                  |                                                             | NC1        | - | EtOH           | -26.447 | 0.512 |
|                                  |                                                             | NC1        | - | MeOH 50        | -18.866 | 0.612 |
|                                  |                                                             | NC1        | - | MeOH 100       | 28.484  | 0.165 |
|                                  |                                                             | NC1        | - | DMSO 10        | 25.936  | 0.339 |
|                                  |                                                             | NC1        | - | DMSO 50        | 13.333  | 0.924 |
|                                  |                                                             | EtOH       | - | MeOH 50        | -7.580  | 0.987 |
|                                  |                                                             | EtOH       | - | MeOH 100       | -54.931 | 0.008 |
|                                  |                                                             | EtOH       | - | DMSO 10        | 52.382  | 0.012 |
|                                  |                                                             | EtOH       | - | DMSO 50        | 39.780  | 0.111 |
|                                  |                                                             | MeOH 50    | - | MeOH 100       | 47.351  | 0.000 |
|                                  |                                                             | MeOH 50    | - | DMSO 10        | 44.802  | 0.001 |
|                                  |                                                             | MeOH 50    | - | DMSO 50        | 32.199  | 0.089 |
|                                  |                                                             | MeOH 100   | - | DMSO 10        | -2.549  | 0.999 |
|                                  |                                                             | MeOH 100   | - | DMSO 50        | -15.151 | 0.601 |
|                                  |                                                             | DMSO 10    | - | DMSO 50        | 12.603  | 0.872 |
| Lipid peroxidation (LPO)         |                                                             |            |   |                |         |       |
|                                  | Shapiro-Wilk normality test                                 |            |   | W= 0.9508      | 0.02695 |       |
|                                  | Levene's Test for Homogeneity of Variance (center = median) |            |   | F= 0.9751      | 0.4426  |       |
|                                  | Kruskal-Wallis rank sum test                                |            |   | χ2 (5)= 39.542 | <0.0001 |       |
|                                  | Dunn's post hoc comparison                                  | NC1        | - | EtOH           | -2.427  | 0.029 |
|                                  |                                                             | NC1        | - | MeOH 50        | -2.187  | 0.048 |
|                                  |                                                             | NC1        | - | MeOH 100       | -2.802  | 0.011 |
|                                  |                                                             | NC1        | - | DMSO 10        | 1.753   | 0.119 |
|                                  |                                                             | NC1        | - | DMSO 50        | 1.214   | 0.307 |
|                                  |                                                             | EtOH       | - | MeOH 50        | -0.240  | 0.811 |
|                                  |                                                             | EtOH       | - | MeOH 100       | 0.375   | 0.759 |
|                                  |                                                             | EtOH       | - | DMSO 10        | 4.180   | 0.000 |
|                                  |                                                             | EtOH       | - | DMSO 50        | 3.641   | 0.001 |
|                                  |                                                             | MeOH 50    | - | MeOH 100       | -0.614  | 0.674 |
|                                  |                                                             | MeOH 50    | - | DMSO 10        | 3.940   | 0.000 |
|                                  |                                                             | MeOH 50    | - | DMSO 50        | 3.401   | 0.002 |
|                                  |                                                             | MeOH 100   | - | DMSO 10        | 4.555   | 0.000 |

|                                     |                                           |                                  |                             |              |
|-------------------------------------|-------------------------------------------|----------------------------------|-----------------------------|--------------|
|                                     |                                           | <b>MeOH 100</b> - <b>DMSO 50</b> | 4.015                       | 0.000        |
|                                     |                                           | DMSO 10 - DMSO 50                | 0.539                       | 0.680        |
| <b>Catalase (CAT)</b>               |                                           |                                  |                             |              |
|                                     | Shapiro-Wilk normality test               |                                  | W=0.97459                   | 0.3542       |
|                                     | Bartlett test of homogeneity of variances |                                  | k <sup>2</sup> =5.5342      | 0.3542       |
|                                     | ANOVA                                     |                                  | sum <sup>2</sup> (5)=0.8509 | <0,0001      |
| Tukey multiple comparisons of means |                                           | NC1 - EtOH                       | 0.024                       | 0.997        |
|                                     |                                           | NC1 - MeOH 50                    | 0.073                       | 0.714        |
|                                     |                                           | <b>NC1 - MeOH 100</b>            | <b>-0.243</b>               | <b>0.000</b> |
|                                     |                                           | NC1 - DMSO 10                    | 0.129                       | 0.144        |
|                                     |                                           | NC1 - DMSO 50                    | 0.122                       | 0.186        |
|                                     |                                           | EtOH - MeOH 50                   | -0.050                      | 0.927        |
|                                     |                                           | <b>EtOH - MeOH 100</b>           | <b>0.266</b>                | <b>0.000</b> |
|                                     |                                           | EtOH - DMSO 10                   | 0.106                       | 0.332        |
|                                     |                                           | EtOH - DMSO 50                   | 0.099                       | 0.404        |
|                                     |                                           | <b>MeOH 50 - MeOH 100</b>        | <b>-0.316</b>               | <b>0.000</b> |
|                                     |                                           | MeOH 50 - DMSO 10                | 0.056                       | 0.886        |
|                                     |                                           | MeOH 50 - DMSO 50                | 0.049                       | 0.930        |
|                                     |                                           | <b>MeOH 100 - DMSO 10</b>        | <b>0.372</b>                | <b>0.000</b> |
|                                     |                                           | <b>MeOH 100 - DMSO 50</b>        | <b>0.365</b>                | <b>0.000</b> |
|                                     |                                           | DMSO 10 - DMSO 50                | 0.007                       | 1.000        |

## SUB-EXPERIMENT 2

### Cellular energy allocation (CEA)

|  |                                                             |  |                           |         |
|--|-------------------------------------------------------------|--|---------------------------|---------|
|  | Shapiro-Wilk normality test                                 |  | W=0.8102                  | <0.0001 |
|  | Levene's Test for Homogeneity of Variance (center = median) |  | F=3.0614                  | 0.0655  |
|  | Kruskal-Wallis rank sum test                                |  | χ <sup>2</sup> (2)= 0.469 | 0.7909  |

### Lipid peroxidation (LPO)

|                            |                                                             |                         |                           |              |
|----------------------------|-------------------------------------------------------------|-------------------------|---------------------------|--------------|
|                            | Shapiro-Wilk normality test                                 |                         | W=0.9039                  | 0.0164       |
|                            | Levene's Test for Homogeneity of Variance (center = median) |                         | F=0.1595                  | 0.8535       |
|                            | Kruskal-Wallis rank sum test                                |                         | χ <sup>2</sup> (2)=17.173 | 0.0002       |
| Dunn's post hoc comparison |                                                             | NC2 - DMF 50            | <b>-1.218</b>             | 0.223        |
|                            |                                                             | <b>NC2 - DMF 100</b>    | <b>-3,9574</b>            | <b>0.000</b> |
|                            |                                                             | <b>DMF 50 - DMF 100</b> | <b>-2.822</b>             | <b>0.007</b> |

### Catalase (CAT)

|  |                                           |  |                       |         |
|--|-------------------------------------------|--|-----------------------|---------|
|  | Shapiro-Wilk normality test               |  | W=0.9327              | 0.0806  |
|  | Bartlett test of homogeneity of variances |  | k <sup>2</sup> =22.38 | <0.0001 |
|  | Welch-ANOVA                               |  | F=2.1035              | 0.1677  |



**S.3.3 Statistics for CEA biomarker analysis (i.e., carbohydrates (CBH), lipids, proteins, energy transport system (ETS)) of the two sub-experiments.**

*Table S6: Statistical analysis for energy reserves (i.e., carbohydrates, lipids, protein) and energy consumption (i.e., energy transport system) for CEA calculations of each sub-experiment (grey background= comparisons with controls; bold= indicating statistical significances).*

| Biomarker           | Statistical Test                                            | Comparison |         |          | Statistic     | p-value |  |
|---------------------|-------------------------------------------------------------|------------|---------|----------|---------------|---------|--|
| SUB-EXPERIMENT 1    |                                                             |            |         |          |               |         |  |
| Carbohydrates (CBH) |                                                             |            |         |          |               |         |  |
|                     | Shapiro-Wilk normality test                                 |            |         |          | W=0.9784      | 0.4339  |  |
|                     | Bartlett test of homogeneity of variances                   |            |         |          | k²= 15.775    | 0.0075  |  |
|                     | Welch ANOVA                                                 |            |         |          | F=4.7241      | 0.0047  |  |
|                     | Games Howell post hoc comparison                            |            | Group1  | -        | Group2        |         |  |
|                     |                                                             | NC1        | -       | EtOH     | -0.343        | 0.998   |  |
|                     |                                                             | NC1        | -       | MeOH 50  | -0.274        | 0.999   |  |
|                     |                                                             | NC1        | -       | MeOH 100 | 1.327         | 0.622   |  |
|                     |                                                             | NC1        | -       | DMSO 10  | 1.696         | 0.426   |  |
|                     |                                                             | NC1        | -       | DMSO 50  | 0.461         | 0.990   |  |
|                     |                                                             | EtOH       | -       | MeOH 50  | -0.069        | 1.000   |  |
|                     |                                                             | EtOH       | -       | MeOH 100 | -1.670        | 0.130   |  |
|                     |                                                             | EtOH       | -       | DMSO 10  | 2.039         | 0.074   |  |
|                     |                                                             | EtOH       | -       | DMSO 50  | 0.804         | 0.702   |  |
|                     |                                                             | MeOH 50    | -       | MeOH 100 | 1.601         | 0.042   |  |
|                     |                                                             | MeOH 50    | -       | DMSO 10  | 1.970         | 0.034   |  |
|                     |                                                             | MeOH 50    | -       | DMSO 50  | 0.735         | 0.373   |  |
|                     |                                                             | MeOH 100   | -       | DMSO 10  | 0.369         | 0.992   |  |
|                     |                                                             | MeOH 100   | -       | DMSO 50  | -0.866        | 0.591   |  |
|                     |                                                             | DMSO 10    | -       | DMSO 50  | 1.235         | 0.353   |  |
| Lipids              |                                                             |            |         |          |               |         |  |
|                     | Shapiro-Wilk normality test                                 |            |         |          | W= 0.8366     | <0.0001 |  |
|                     | Levene's Test for Homogeneity of Variance (center = median) |            |         |          | F=2.3079      | 0.0587  |  |
|                     | Kruskal-Wallis rank sum test                                |            |         |          | χ² (5)=7.3613 | 0.1951  |  |
| Protein             |                                                             |            |         |          |               |         |  |
|                     | Shapiro-Wilk normality test                                 |            |         |          | W= 0.9352     | 0.006   |  |
|                     | Levene's Test for Homogeneity of Variance (center = median) |            |         |          | F=0.8932      | 0.4932  |  |
|                     | Kruskal-Wallis rank sum test                                |            |         |          | χ² (5)=24.286 | 0.0002  |  |
|                     | Dunn's post hoc comparison                                  |            | Group1  | -        | Group2        |         |  |
|                     |                                                             | NC1        | -       | EtOH     | -0.959        | 0.422   |  |
|                     |                                                             | NC1        | -       | MeOH 50  | -1.378        | 0.280   |  |
|                     |                                                             | NC1        | -       | MeOH 100 | -2.562        | 0.039   |  |
|                     |                                                             | NC1        | -       | DMSO 10  | -2.128        | 0.083   |  |
|                     |                                                             | NC1        | -       | DMSO 50  | -4.525        | 0.000   |  |
| EtOH                |                                                             | -          | MeOH 50 | 0.420    | 0.675         |         |  |
| EtOH                | -                                                           | MeOH 100   | 1.603   | 0.204    |               |         |  |

|  |                                        |               |              |
|--|----------------------------------------|---------------|--------------|
|  | <i>EtOH</i> - <i>DMSO 10</i>           | -1.169        | 0.331        |
|  | <b><i>EtOH</i> - <i>DMSO 50</i></b>    | <b>-3.566</b> | <b>0.003</b> |
|  | <i>MeOH 50</i> - <i>MeOH 100</i>       | -1.184        | 0.331        |
|  | <i>MeOH 50</i> - <i>DMSO 10</i>        | -0.749        | 0.524        |
|  | <b><i>MeOH 50</i> - <i>DMSO 50</i></b> | <b>-3.146</b> | <b>0.008</b> |
|  | <i>MeOH 100</i> - <i>DMSO 10</i>       | 0.434         | 0.675        |
|  | <i>MeOH 100</i> - <i>DMSO 50</i>       | -1.963        | 0.106        |
|  | <i>DMSO 10</i> - <i>DMSO 50</i>        | 2.397         | 0.050        |

### Electron Transport System (ETS)

|                            |                                                             |                       |   |                        |                     |
|----------------------------|-------------------------------------------------------------|-----------------------|---|------------------------|---------------------|
| Dunn's post hoc comparison | Shapiro-Wilk normality test                                 |                       |   | W=0.5043               | <0.0001             |
|                            | Levene's Test for Homogeneity of Variance (center = median) |                       |   | F=2.3229               | 0.0573              |
|                            | Kruskal-Wallis rank sum test                                |                       |   | $\chi^2$ (5)=34.479    | <0.0001             |
|                            |                                                             | <b>Group1</b>         | - | <b>Group2</b>          |                     |
|                            |                                                             | <i>NC1</i>            | - | <i>EtOH</i>            | 1.019 0.450         |
|                            |                                                             | <i>NC1</i>            | - | <i>MeOH 50</i>         | 0.974 0.450         |
|                            |                                                             | <i>NC1</i>            | - | <b><i>MeOH 100</i></b> | <b>-2.787 0.011</b> |
|                            |                                                             | <i>NC1</i>            | - | <b><i>DMSO 10</i></b>  | <b>-2.532 0.019</b> |
|                            |                                                             | <i>NC1</i>            | - | <b><i>DMSO 50</i></b>  | <b>-2.652 0.015</b> |
|                            |                                                             | <b><i>EtOH</i></b>    | - | <b><i>MeOH 50</i></b>  | <b>0.045 0.964</b>  |
|                            |                                                             | <b><i>EtOH</i></b>    | - | <b><i>MeOH 100</i></b> | <b>3.805 0.001</b>  |
|                            |                                                             | <b><i>EtOH</i></b>    | - | <b><i>DMSO 10</i></b>  | <b>-3.551 0.001</b> |
|                            |                                                             | <b><i>EtOH</i></b>    | - | <b><i>DMSO 50</i></b>  | <b>-3.671 0.001</b> |
|                            |                                                             | <b><i>MeOH 50</i></b> | - | <b><i>MeOH 100</i></b> | <b>-3.761 0.001</b> |
|                            |                                                             | <b><i>MeOH 50</i></b> | - | <b><i>DMSO 10</i></b>  | <b>-3.506 0.001</b> |
|                            |                                                             | <b><i>MeOH 50</i></b> | - | <b><i>DMSO 50</i></b>  | <b>-3.626 0.001</b> |
|                            |                                                             | <i>MeOH 100</i>       | - | <i>DMSO 10</i>         | 0.255 0.964         |
|                            |                                                             | <i>MeOH 100</i>       | - | <i>DMSO 50</i>         | 0.135 0.964         |
|                            |                                                             | <i>DMSO 10</i>        | - | <i>DMSO 50</i>         | 0.120 0.964         |

| Parameter | Statistical Test | Comparison | Statistic | p-value |
|-----------|------------------|------------|-----------|---------|
|-----------|------------------|------------|-----------|---------|

### SUB-EXPERIMENT 2

#### Carbohydrates (CBH)

|  |                                           |  |  |                |        |
|--|-------------------------------------------|--|--|----------------|--------|
|  | Shapiro-Wilk normality test               |  |  | W=0.9713       | 0.6374 |
|  | Bartlett test of homogeneity of variances |  |  | $k^2$ = 1.7044 | 0.4265 |
|  | Welch ANOVA                               |  |  | F=0.6365       | 0.5423 |

#### Lipids

|  |                                                             |  |  |                     |         |
|--|-------------------------------------------------------------|--|--|---------------------|---------|
|  | Shapiro-Wilk normality test                                 |  |  | W= 0.7257           | <0.0001 |
|  | Levene's Test for Homogeneity of Variance (center = median) |  |  | F=0.3415            | 0.7141  |
|  | Kruskal-Wallis rank sum test                                |  |  | $\chi^2$ (2)=2.6435 | 0.2667  |

#### Protein

|  |                                           |               |   |                   |        |
|--|-------------------------------------------|---------------|---|-------------------|--------|
|  | Shapiro-Wilk normality test               |               |   | W= 0.9297         | 0.0681 |
|  | Bartlett test of homogeneity of variances |               |   | $k^2$ =5.1468     | 0.0763 |
|  | ANOVA                                     |               |   | $sum^2$ (2)=21.12 | 0.0032 |
|  | Dunn's post hoc comparison                | <b>Group1</b> | - | <b>Group2</b>     |        |

|                                        |                                                             |               |   |                |                     |              |
|----------------------------------------|-------------------------------------------------------------|---------------|---|----------------|---------------------|--------------|
|                                        |                                                             | <i>NC1</i>    | - | <i>DMF 50</i>  | <b>-1.979</b>       | <b>0.005</b> |
|                                        |                                                             | <i>NC1</i>    | - | <i>DMF 100</i> | <b>-1.752</b>       | <b>0.013</b> |
|                                        |                                                             | <i>DMF 50</i> | - | <i>DMF 100</i> | 0.227               | 0.915        |
| <b>Electron Transport System (ETS)</b> |                                                             |               |   |                |                     |              |
|                                        | Shapiro-Wilk normality test                                 |               |   |                | <i>W</i> =0.7102    | <0.0001      |
|                                        | Levene's Test for Homogeneity of Variance (center = median) |               |   |                | <i>F</i> =1.7421    | 0.1966       |
|                                        | Kruskal-Wallis rank sum test                                |               |   |                | $\chi^2$ (5)=9.6508 | 0.008        |
|                                        |                                                             | <b>Group1</b> | - | <b>Group2</b>  |                     |              |
|                                        | <i>Dunn's post hoc comparison</i>                           | <i>NC1</i>    | - | <i>DMF 50</i>  | <b>-2.851</b>       | <b>0.013</b> |
|                                        |                                                             | <i>NC1</i>    | - | <i>DMF 100</i> | <b>-2.494</b>       | <b>0.019</b> |
|                                        |                                                             | <i>DMF 50</i> | - | <i>DMF 100</i> | 0.356               | 0.722        |

## S4 – References:

1. Borneman, E. Introduction to the husbandry of corals in aquariums: A review. *Public Aquarium Husbandry Series* **2008**, 2, 3-14.
2. Fosså, S.A.; Nilsen, A.J. *Das Korallenriff-Aquarium*; Natur und Tier Verlag GmbH: Münster, **2013**.
3. TropicMarin. Supply System. Available online: <https://www.tropicmarin.com/versorgungssysteme?lang=en> (accessed on 03/2023)
